# Supplementary material for: Carbonate chemistry of an in-situ free-ocean CO2 enrichment experiment (antFOCE) in comparison to short term variation in Antarctic coastal waters
Source: PubMed Central journal article supplement (PMC5809532; doi:10.1038/s41598-018-21029-1), 2018-02-12
Supplement: 41598_2018_21029_MOESM1_ESM.pdf [file 41598_2018_21029_MOESM1_ESM.pdf]

**Supplementary Information for: Carbonate chemistry of an in situ free-ocean CO<sub>2</sub> enrichment experiment (antFOCE) in comparison to short term variation in Antarctic coastal waters**

J.S Stark, N.P. Roden, G. Johnstone, M. Milnes, J. Black, S. Whiteside, W. Kirkwood, K. Newbery, S. Stark, E. van Ooijen, B. Tilbrook, E.T. Peltzer, K. Berry, D. Roberts

## Carbonate chemistry of an in situ free-ocean CO<sub>2</sub> enrichment experiment in Antarctica

Supplementary Table S1: Summary of weekly mean carbonate chemistry conditions in antFOCE experiment showing pH<sub>tot</sub>, aragonite saturation state and fugacity of fCO<sub>2</sub>. Data are shown for the acclimatization period (19 December 2014 – 2 January 2015) and experimental period (2 January 2015 – 27 February 2015), with the total number of downtime days (system stoppages) for each corresponding week and period at the bottom of each column. Ambient seawater data are from experiment site. s.d. = standard deviation. Offset shows the difference between the ambient and control chambers, and acidified and control chambers.

|                                        | Acclimatization period                                                 |                |                | Experimental period |                |                |                |                |                |                |                |                |
|----------------------------------------|------------------------------------------------------------------------|----------------|----------------|---------------------|----------------|----------------|----------------|----------------|----------------|----------------|----------------|----------------|
|                                        | Week 1                                                                 | Week 2         | Mean           | Week 1              | Week 2         | Week 3         | Week 4         | Week 5         | Week 6         | Week 7         | Week 8         | Mean           |
|                                        | mean pH <sub>tot</sub> (± 1 s.d.)                                      |                |                |                     |                |                |                |                |                |                |                |                |
| Ambient seawater                       | 8.054 ± 0.005                                                          | 8.049 ± 0.009  | 8.052 ± 0.008  | 8.043 ± 0.008       | 8.053 ± 0.006  | 8.065 ± 0.011  | 8.084 ± 0.010  | 8.091 ± 0.007  | 8.101 ± 0.015  | 8.102 ± 0.008  | 8.108 ± 0.008  | 8.081 ± 0.025  |
| Control chambers                       | 7.997 ± 0.019                                                          | 8.005 ± 0.037  | 8.001 ± 0.029  | 8.036 ± 0.032       | 8.023 ± 0.041  | 8.055 ± 0.031  | 8.067 ± 0.026  | 8.082 ± 0.030  | 8.099 ± 0.033  | 8.099 ± 0.035  | 8.100 ± 0.032  | 8.068 ± 0.044  |
| Offset <sub>cont-amb</sub>             | -0.059 ± 0.020                                                         | -0.049 ± 0.037 | -0.054 ± 0.030 | -0.006 ± 0.035      | -0.029 ± 0.040 | -0.010 ± 0.031 | -0.015 ± 0.028 | -0.009 ± 0.031 | -0.003 ± 0.032 | -0.004 ± 0.032 | -0.009 ± 0.030 | -0.011 ± 0.034 |
| Experiment chamber (A)                 | 7.978 ± 0.060                                                          | 7.948 ± 0.057  | 7.964 ± 0.060  | 7.749 ± 0.110       | 7.645 ± 0.091  | 7.660 ± 0.050  | 7.682 ± 0.102  | 7.683 ± 0.063  | 7.705 ± 0.062  | 7.701 ± 0.081  | 7.700 ± 0.072  | 7.687 ± 0.085  |
| Offset <sub>exp-cont</sub> chamber (A) | -0.020 ± 0.058                                                         | -0.059 ± 0.067 | -0.038 ± 0.065 | -0.290 ± 0.113      | -0.381 ± 0.057 | -0.395 ± 0.028 | -0.391 ± 0.074 | -0.402 ± 0.025 | -0.392 ± 0.054 | -0.405 ± 0.034 | -0.402 ± 0.042 | -0.383 ± 0.066 |
| Experiment chamber (B)                 | 7.981 ± 0.053                                                          | 7.945 ± 0.051  | 7.964 ± 0.055  | 7.752 ± 0.105       | 7.654 ± 0.088  | 7.655 ± 0.050  | 7.688 ± 0.097  | 7.682 ± 0.051  | 7.701 ± 0.051  | 7.701 ± 0.073  | 7.697 ± 0.060  | 7.688 ± 0.078  |
| Offset <sub>exp-cont</sub> chamber (B) | -0.017 ± 0.053                                                         | -0.059 ± 0.056 | -0.036 ± 0.058 | -0.285 ± 0.109      | -0.370 ± 0.056 | -0.400 ± 0.027 | -0.382 ± 0.076 | -0.400 ± 0.026 | -0.399 ± 0.032 | -0.401 ± 0.041 | -0.404 ± 0.033 | -0.382 ± 0.065 |
|                                        | mean aragonite saturation state (Ω <sub>ar</sub> ) (± 1 s.d.)          |                |                |                     |                |                |                |                |                |                |                |                |
| Ambient seawater                       | 1.36 ± 0.01                                                            | 1.36 ± 0.02    | 1.36 ± 0.02    | 1.35 ± 0.02         | 1.38 ± 0.02    | 1.42 ± 0.04    | 1.46 ± 0.04    | 1.43 ± 0.02    | 1.44 ± 0.03    | 1.44 ± 0.02    | 1.46 ± 0.03    | 1.42 ± 0.05    |
| Control chambers                       | 1.21 ± 0.05                                                            | 1.24 ± 0.10    | 1.22 ± 0.08    | 1.33 ± 0.09         | 1.30 ± 0.11    | 1.39 ± 0.09    | 1.39 ± 0.07    | 1.40 ± 0.09    | 1.43 ± 0.09    | 1.43 ± 0.10    | 1.44 ± 0.10    | 1.39 ± 0.11    |
| Offset <sub>cont-amb</sub>             | -0.16 ± 0.05                                                           | -0.13 ± 0.10   | -0.15 ± 0.08   | -0.02 ± 0.10        | -0.08 ± 0.11   | -0.03 ± 0.09   | -0.04 ± 0.08   | -0.03 ± 0.09   | -0.01 ± 0.09   | -0.01 ± 0.10   | -0.03 ± 0.09   | -0.03 ± 0.10   |
| Experiment chamber (A)                 | 1.17 ± 0.14                                                            | 1.10 ± 0.13    | 1.14 ± 0.14    | 0.74 ± 0.19         | 0.58 ± 0.15    | 0.60 ± 0.07    | 0.62 ± 0.18    | 0.60 ± 0.11    | 0.62 ± 0.11    | 0.62 ± 0.15    | 0.62 ± 0.14    | 0.62 ± 0.15    |
| Offset <sub>exp-cont</sub> chamber (A) | -0.04 ± 0.13                                                           | -0.14 ± 0.16   | -0.09 ± 0.15   | -0.60 ± 0.21        | -0.72 ± 0.09   | -0.79 ± 0.05   | -0.78 ± 0.14   | -0.81 ± 0.05   | -0.80 ± 0.11   | -0.82 ± 0.07   | -0.82 ± 0.10   | -0.77 ± 0.13   |
| Experiment chamber (B)                 | 1.17 ± 0.11                                                            | 1.09 ± 0.12    | 1.14 ± 0.12    | 0.75 ± 0.18         | 0.60 ± 0.14    | 0.59 ± 0.07    | 0.63 ± 0.19    | 0.60 ± 0.08    | 0.61 ± 0.09    | 0.62 ± 0.13    | 0.61 ± 0.11    | 0.62 ± 0.13    |
| Offset <sub>exp-cont</sub> chamber (B) | -0.04 ± 0.10                                                           | -0.14 ± 0.13   | -0.08 ± 0.13   | -0.59 ± 0.2         | -0.70 ± 0.09   | -0.80 ± 0.05   | -0.77 ± 0.14   | -0.81 ± 0.05   | -0.82 ± 0.08   | -0.82 ± 0.09   | -0.83 ± 0.08   | -0.77 ± 0.13   |
|                                        | mean fugacity of carbon dioxide (f CO <sub>2</sub> ) (µatm) (± 1 s.d.) |                |                |                     |                |                |                |                |                |                |                |                |

## Carbonate chemistry of an in situ free-ocean CO<sub>2</sub> enrichment experiment in Antarctica

|                                        |          |          |          |           |            |                |           |           |           |           |           |           |
|----------------------------------------|----------|----------|----------|-----------|------------|----------------|-----------|-----------|-----------|-----------|-----------|-----------|
| Ambient seawater                       | 368 ± 4  | 374 ± 9  | 371 ± 8  | 379 ± 7   | 370 ± 6    | 359 ± 10       | 340 ± 9   | 329 ± 6   | 319 ± 13  | 318 ± 7   | 314 ± 7   | 341 ± 25  |
| Control chambers                       | 425 ± 20 | 419 ± 37 | 422 ± 29 | 387 ± 31  | 400 ± 39   | 369 ± 29       | 354 ± 23  | 338 ± 26  | 321 ± 28  | 321 ± 28  | 321 ± 26  | 354 ± 42  |
| Offset <sub>cont-amb</sub>             | 59 ± 20  | 49 ± 38  | 55 ± 30  | 7 ± 34    | 30 ± 39    | 10 ± 29        | 13 ± 24   | 8 ± 26    | 3 ± 26    | 4 ± 26    | 8 ± 24    | 11 ± 31   |
| Experiment chamber (A)                 | 450 ± 75 | 485 ± 69 | 466 ± 74 | 810 ± 203 | 1028 ± 189 | 979 ± 110      | 938 ± 155 | 908 ± 112 | 855 ± 106 | 868 ± 129 | 868 ± 111 | 914 ± 159 |
| Offset <sub>exp-cont</sub> chamber (A) | 26 ± 74  | 69 ± 80  | 46 ± 79  | 428 ± 202 | 631 ± 149  | 589 ± 610 ± 85 | 127       | 575 ± 74  | 530 ± 93  | 556 ± 79  | 550 ± 75  | 130       |
| Experiment chamber (B)                 | 446 ± 84 | 487 ± 62 | 465 ± 77 | 801 ± 191 | 1003 ± 179 | 990 ± 112      | 919 ± 153 | 908 ± 97  | 861 ± 92  | 121       | 100       | 911 ± 150 |
| Offset <sub>exp-cont</sub> chamber (B) | 23 ± 87  | 67 ± 66  | 43 ± 81  | 417 ± 190 | 605 ± 141  | 569 ± 622 ± 86 | 128       | 571 ± 69  | 541 ± 66  | 549 ± 86  | 553 ± 67  | 124       |
| Downtime (total days)                  | 4.15     | 4.4      | 8.55     | 2.26      | 0.44       | 0.22           | 2.03      | 1.49      | 1.1       | 2.32      | 2.33      | 12.19     |

## Carbonate chemistry of an in situ free-ocean CO<sub>2</sub> enrichment experiment in Antarctica

Supplementary Table S2: Summary of changes in ambient seawater conditions within O'Brien Bay, the site of the antFOCE experiment. a) daily changes and b) seasonal values between 19 December 2014 – 27 February 2015. O<sub>2</sub> = dissolved oxygen; DIC = calculated dissolved inorganic carbon; Ω<sub>ar</sub> = saturation state of aragonite; fCO<sub>2</sub> = fugacity of CO<sub>2</sub>.

| a) Daily changes                   | pH <sub>tot</sub> | O <sub>2</sub><br>(μmol<br>kg <sup>-1</sup> ) | DIC<br>(μmol<br>kg <sup>-1</sup> ) | Ω <sub>ar</sub> | fCO <sub>2</sub><br>(μatm) | Salinity          | Temp<br>(°C)      |
|------------------------------------|-------------------|-----------------------------------------------|------------------------------------|-----------------|----------------------------|-------------------|-------------------|
| <b>Ambient (experiment site)</b>   |                   |                                               |                                    |                 |                            |                   |                   |
| Minimum range                      | 0.008             | 3                                             | 3                                  | 0.02            | 8                          | 0.007             | 0.008             |
| Maximum range                      | 0.049             | 23                                            | 22                                 | 0.16            | 44                         | 0.226             | 0.301             |
| Mean range (± 1 s.d.)              | 0.020 ±<br>0.008  | 8 ± 3                                         | 9 ± 4                              | 0.06 ±<br>0.02  | 18 ± 7                     | 0.050 ±<br>0.048  | 0.076 ±<br>0.069  |
| <b>Ambient (outer O'Brien Bay)</b> |                   |                                               |                                    |                 |                            |                   |                   |
| Minimum range                      | 0.007             | 4                                             | 2                                  | 0.02            | 6                          | 0.004             | 0.012             |
| Maximum range                      | 0.073             | 33                                            | 28                                 | 0.24            | 52                         | 0.221             | 0.343             |
| Mean range (± 1 s.d.)              | 0.029 ±<br>0.016  | 13 ± 7                                        | 11 ± 6                             | 0.09 ±<br>0.05  | 23 ± 12                    | 0.046 ±<br>0.045  | 0.082 ±<br>0.067  |
| <b>Control chambers</b>            |                   |                                               |                                    |                 |                            |                   |                   |
| Minimum range                      | 0.014             | -                                             | 5                                  | 0.04            | 10                         | -                 | -                 |
| Maximum range                      | 0.127             | -                                             | 47                                 | 0.37            | 115                        | -                 | -                 |
| Mean range (± 1 s.d.)              | 0.077 ±<br>0.027  | -                                             | 28 ± 10                            | 0.22 ±<br>0.08  | 69 ± 25                    | -                 | -                 |
| <b>Experimental chamber (A)</b>    |                   |                                               |                                    |                 |                            |                   |                   |
| Minimum range                      | 0.039             | -                                             | 12                                 | 0.04            | 43                         | -                 | -                 |
| Maximum range                      | 0.535             | -                                             | 167                                | 1.13            | 891                        | -                 | -                 |
| Mean range (± 1 s.d.)              | 0.242 ±<br>0.17   | -                                             | 73 ± 52                            | 0.46 ±<br>0.36  | 390 ±<br>246               | -                 | -                 |
| <b>Experimental chamber (B)</b>    |                   |                                               |                                    |                 |                            |                   |                   |
| Minimum range                      | 0.046             | -                                             | 14                                 | 0.07            | 49                         | -                 | -                 |
| Maximum range                      | 0.545             | -                                             | 167                                | 1.1             | 835                        | -                 | -                 |
| Mean range (± 1 s.d.)              | 0.231 ±<br>0.16   | -                                             | 69 ± 49                            | 0.43 ±<br>0.34  | 382 ±<br>233               | -                 | -                 |
| <b>b) Seasonal values</b>          |                   |                                               |                                    |                 |                            |                   |                   |
| b) Seasonal values                 | pH <sub>tot</sub> | O <sub>2</sub><br>(μmol<br>kg <sup>-1</sup> ) | DIC<br>(μmol<br>kg <sup>-1</sup> ) | Ω <sub>ar</sub> | fCO <sub>2</sub><br>(μatm) | Salinity          | Temp<br>(°C)      |
| <b>Ambient (experiment site)</b>   |                   |                                               |                                    |                 |                            |                   |                   |
| Minimum                            | 8.025             | 333                                           | 2105                               | 1.3             | 291                        | 33.079            | -1.479            |
| Maximum                            | 8.137             | 374                                           | 2206                               | 1.55            | 397                        | 34.257            | -0.609            |
| Range                              | 0.112             | 41                                            | 100                                | 0.25            | 106                        | 1.178             | 0.87              |
| Mean (± 1 s.d.)                    | 8.075 ±<br>0.025  | 348 ± 7                                       | 2166 ±<br>32                       | 1.41 ±<br>0.05  | 348 ± 26                   | 33.785 ±<br>0.430 | -1.120 ±<br>0.242 |
| <b>Ambient (outer O'Brien Bay)</b> |                   |                                               |                                    |                 |                            |                   |                   |
| Minimum                            | 8.052             | 335                                           | 2089                               | 1.37            | 249                        | 33.088            | -1.466            |
| Maximum                            | 8.198             | 400                                           | 2196                               | 1.79            | 371                        | 34.256            | -0.639            |
| Range                              | 0.146             | 65                                            | 107                                | 0.42            | 122                        | 1.168             | 0.827             |
| Mean (± 1 s.d.)                    | 8.107 ±<br>0.028  | 356 ± 11                                      | 2153 ±<br>32                       | 1.51 ±<br>0.07  | 320 ± 25                   | 33.776 ±<br>0.432 | -1.112 ±<br>0.243 |

## Carbonate chemistry of an in situ free-ocean CO<sub>2</sub> enrichment experiment in Antarctica

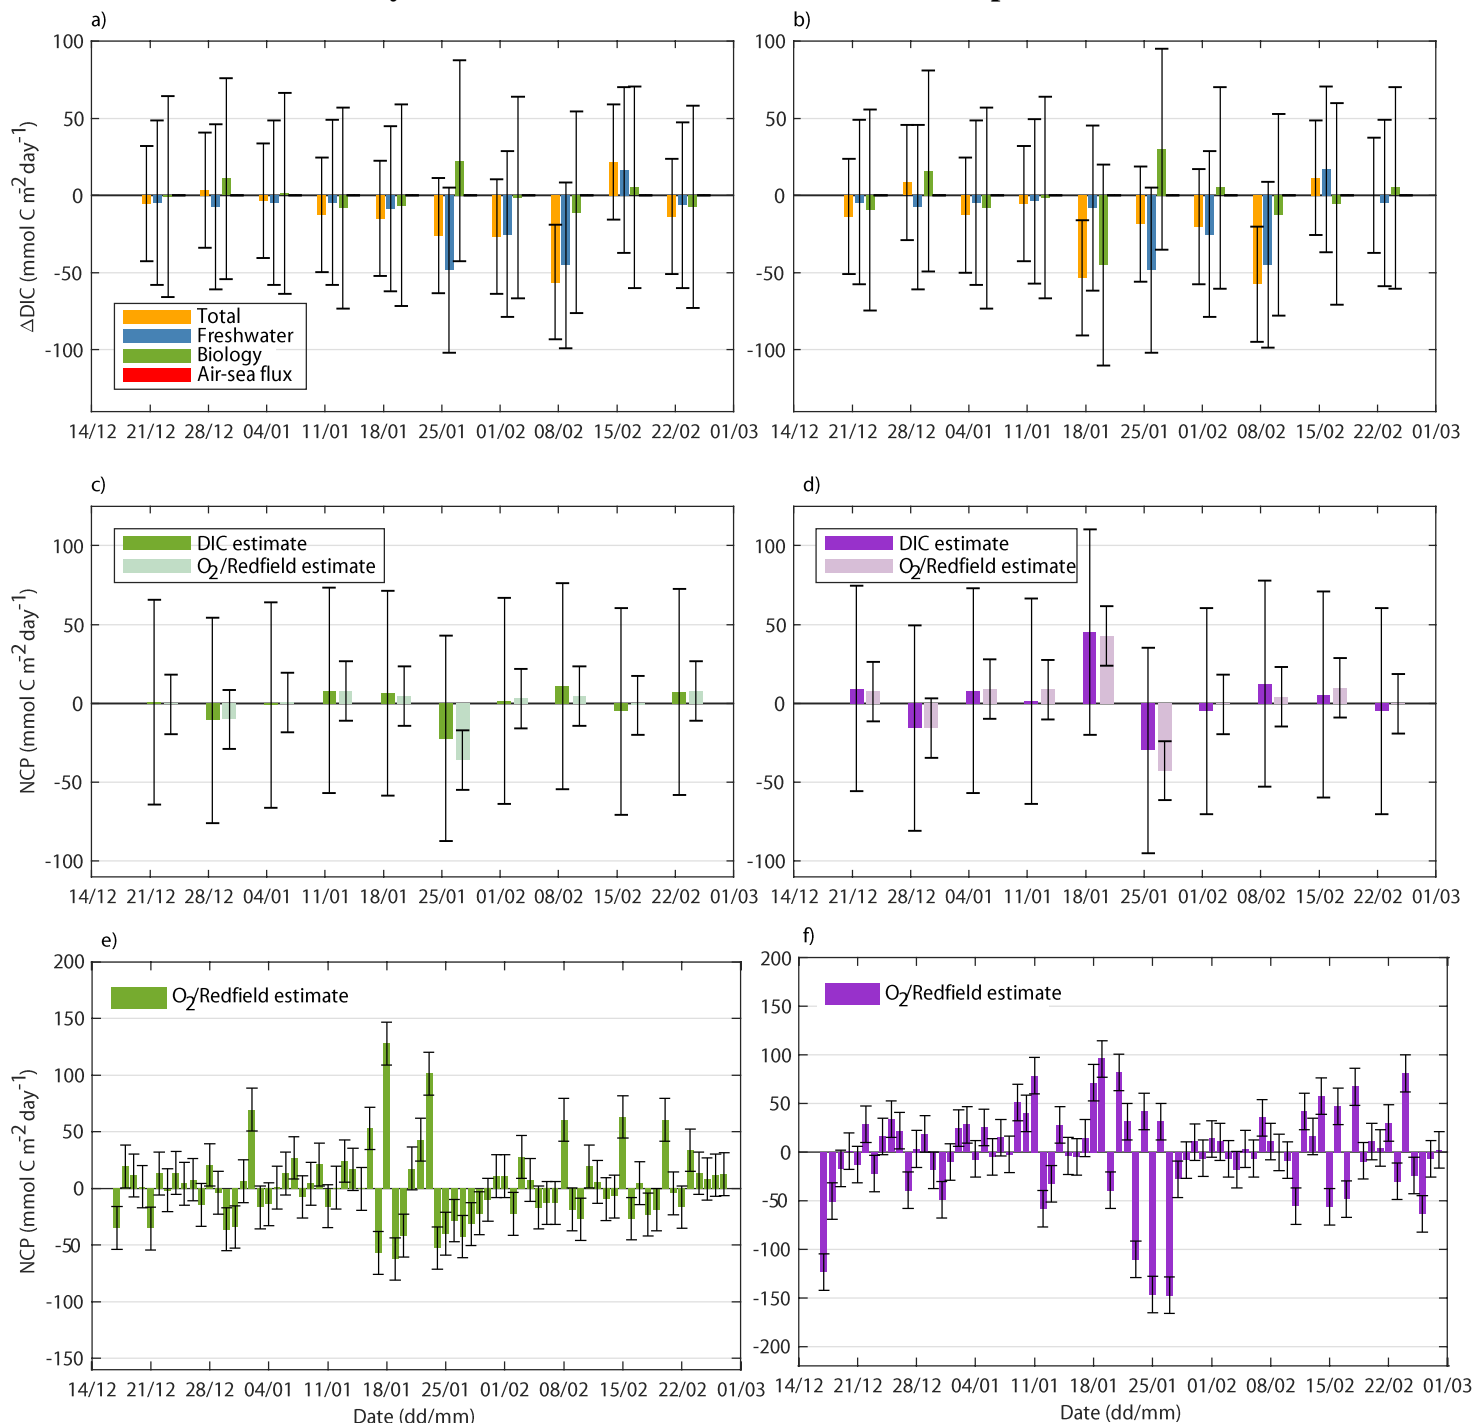

### Supplementary Figure S3: Daily changes in ambient seawater conditions at two sites in

**O'Brien Bay, Casey station, Antarctica.** At the experimental site, a) the weekly mean of daily changes in DIC partitioned into total change, and changes caused by freshwater input, biological activity and air-sea flux. c) The weekly mean of daily NCP values estimated from calculated DIC and measured oxygen and e) daily NCP estimates from calculated DIC. The corresponding parameters for the outer O'Brien Bay site are shown in panels b), d) and f) respectively. Error bars represent the propagated measurement uncertainties and positive NCP values indicate net primary production.

# Carbonate chemistry of an in situ free-ocean CO<sub>2</sub> enrichment experiment in Antarctica

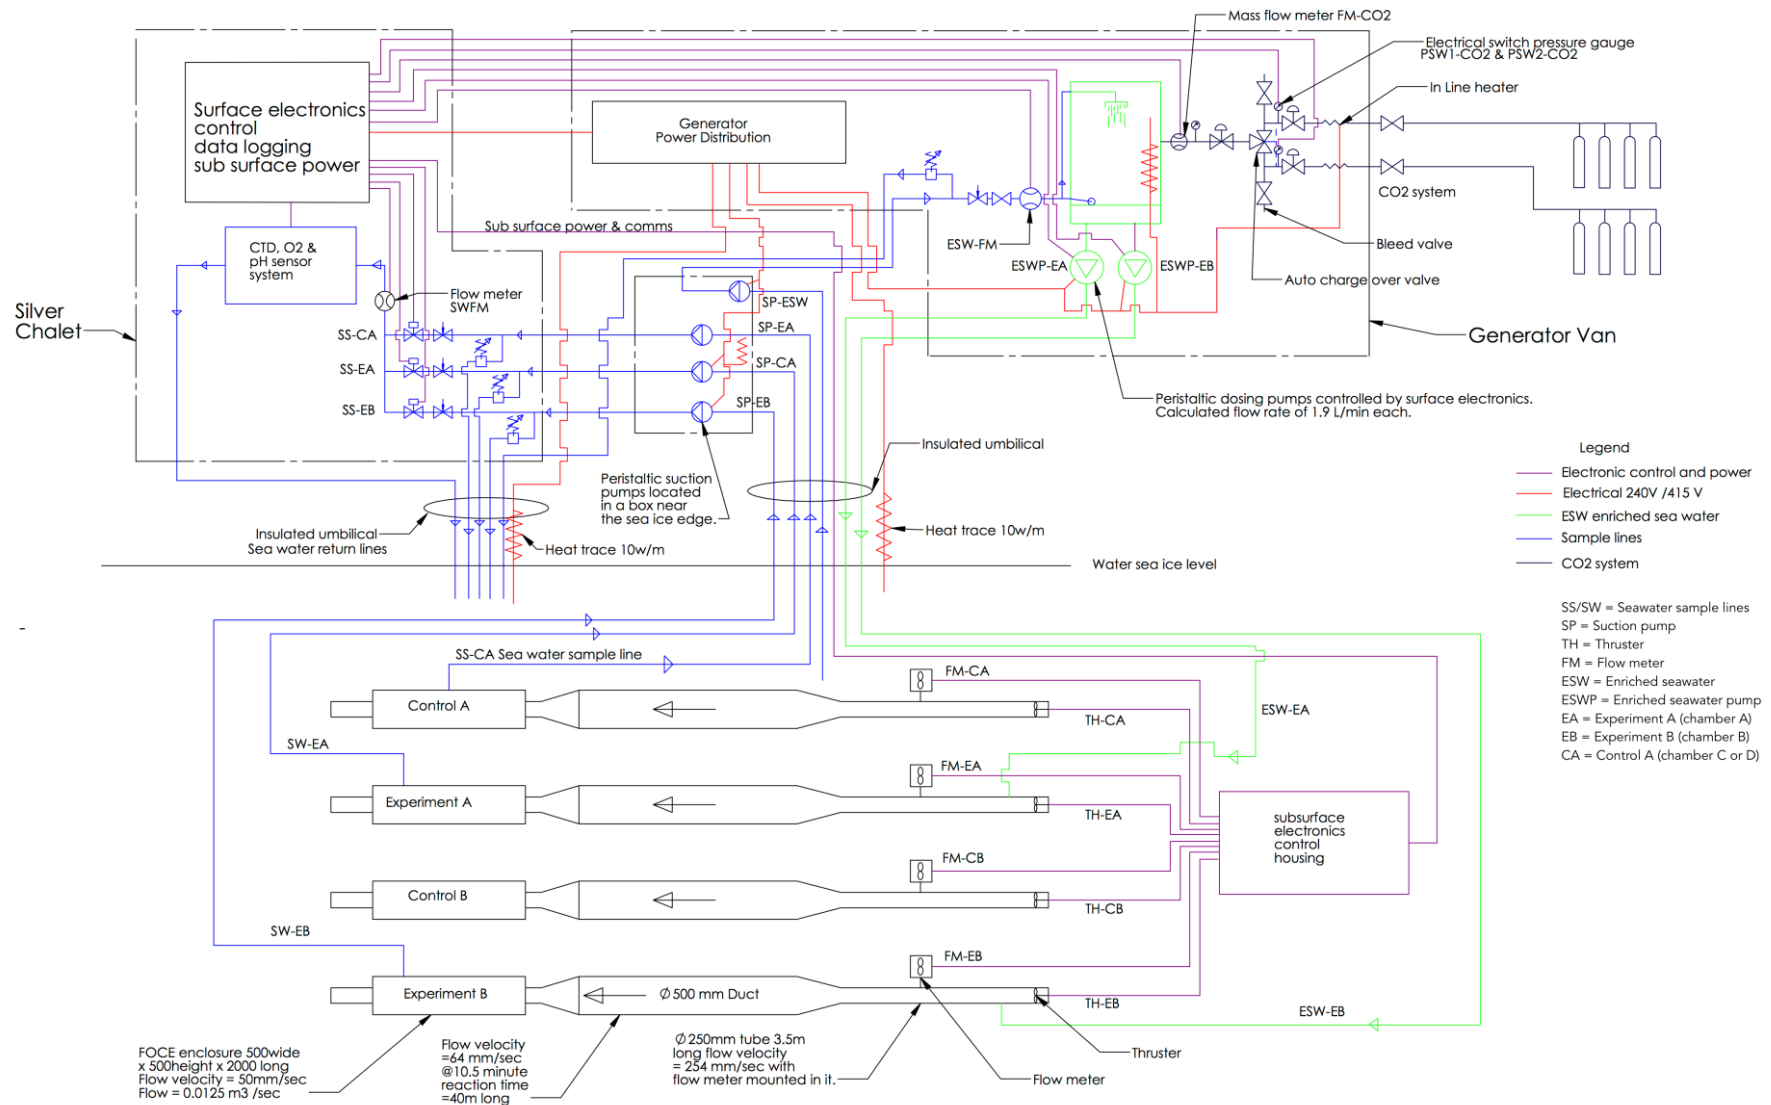

Supplementary Figure S4 Schematic plan of the antFOCE system components.
